# Supplementary material
Source: Springer Nature journal article supplement (https://www.springermedizin.de/resource/supplementary/12914_2013_319_MOESM2_ESM.pdf/9537212)

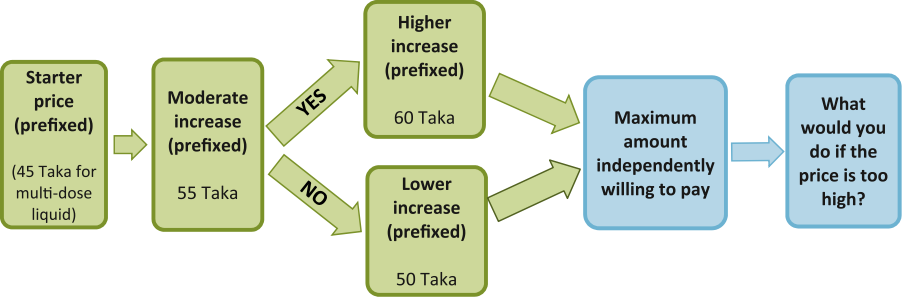

**Bidding game with prefixed prices**

**Independent willingness to pay**

Supplement: MOESM2 [file 9537212]
